# Supplementary material for: Study protocol for an international prospective non-randomized trial evaluating the long term outcomes of Sutureless Aortic Valve Replacement Versus Transcatheter Valve Replacement for Aortic-Valve Stenosis in Patients at Risk to Severe Valve Obstruction: The SuAVR-TAVR trial
Source: Research Square preprint supplement (doi:10.21203/rs.3.rs-6618236/v1), 2025-06-18
Supplement: Supplementary file 1 [file 0194c780c5232a3302489cf3.docx]

| **Supplementary Table 7. Hospitalization (or re-hospitalization)** |
| --- |
| **Definition:** Admissions to inpatient units or hospital wards after the index admission or enrolment in the study are subject to a >/= 24 charge, including emergency department visits. Planned hospital admissions for pre-existing conditions are excluded, unless the condition worsens. Visits to urgent care centres or emergency departments within 24 hours may also be included if the therapy is intensified (e.g. heart failure episodes). |
| **Categories of hospitalization**   - **Cardiovascular hospitalization** - **Procedure-related or valve-related hospitalization** - Hospitalisation for new complications, including but not limited to: stroke, bleeding (e.g. haemothorax, retroperitoneal haematoma), pericardial effusion, vascular or access site complication (e.g. The following are considered to be potential complications: - limb ischaemia, wound infection - new conduction disturbance or arrhythmia (e.g. atrioventricular block, atrial fibrillation) - acute kidney injury - any other procedure-related new complication, including periprocedural valve-related heart failure (e.g. paravalvular leak, worsening LV function, worsening sub-valvular obstruction) - The aggravation or worsening of any previously occurring in-hospital complications during periprocedural care is to be documented (for instance, ventilator-induced pneumonia, pericardial or pleural effusion, recurrent haemothorax, valve-related heart failure). - Bioprosthetic valve dysfunction† includes valve thrombosis, endocarditis, structural valve deterioration, and non-structural valve dysfunction. - Untreated native aortic valve disease‡ or its related consequences must be diagnosed. These include heart failure, syncope, angina, new-onset arrhythmia, endocarditis, or any other symptoms or consequences related to the untreated native aortic valve. - Bleeding complications related to oral anticoagulation or antiplatelet therapy for valve-related thromboembolic prevention or atrial fibrillation - Heart failure-related hospitalizations‡ requiring that new or worsening heart failure be the predominant reason for a hospital stay >/= 24 h on the basis of symptoms and signs of heart failure with confirmation by diagnostic tests and necessitating treatment using intravenous or mechanical heart failure therapies. Includes primary (cardiac related) and secondary (non-cardiac related) - **Other cardiovascular hospitalization** - **Cardiovascular hospitalization not directly related to the index procedure or the untreated native aortic valve.**   The following conditions are to be considered: acute myocardial infarction or chronic coronary artery disease, hypertension, arrhythmia (excluding those related to the procedure or aortic valve), and heart failure from other specific and proven aetiologies (e.g. cardiomyopathies, concomitant untreated non-aortic valvular disease, severe right ventricular dysfunction), and peripheral vascular disease.   - **Non-cardiovascular hospitalization** - **This refers to cases of hospitalisation for reasons not pertaining to cardiovascular diseases.**   The following are included: non-cardiovascular infection and sepsis (e.g. urosepsis), respiratory failure not related to heart failure (e.g. pneumonia), renal failure, liver failure, delirium or dementia, cancer, trauma, or psychiatric illness. |

† see **table 6** and **7**; ‡ In the context of an ongoing strategy trial that aims to establish a comparison between transcatheter or surgical aortic valve replacement and the provision of clinical surveillance with medical therapy, the presence of a native aortic valve that is diseased and untreated should be noted.
