# Supplementary material for: Study protocol for an international prospective non-randomized trial evaluating the long term outcomes of Sutureless Aortic Valve Replacement Versus Transcatheter Valve Replacement for Aortic-Valve Stenosis in Patients at Risk to Severe Valve Obstruction: The SuAVR-TAVR trial
Source: Research Square preprint supplement (doi:10.21203/rs.3.rs-6618236/v1), 2025-06-18
Supplement: Supplementary file 3 [file 2ac60916a7e7bcd6c2d7da10.docx]

**Supplementaty Material**

**S1-Pathophysiology of Aortic Stenosis**

As indicated by the prevailing academic consensus, the pathophysiology of aortic stenosis (AS) comprises three core elements. Firstly, an increase in afterload is observed. Secondly, there is progressive hypertrophy of the left ventricle. Thirdly, there is a decrease in systemic and coronary blood flow as a consequence of valve obstruction. In the majority of cases, patients suffering from AS do not experience cardiovascular symptoms (e.g. angina, syncope and/or heart failure) until a late stage in the course of the disease. Nonetheless, upon the manifestation of symptoms, the prognosis is exceedingly poor, particularly in cases accompanied by congestive heart failure. In general terms, death – both sudden and gradual – occurs predominantly in patients who are exhibiting symptoms. Survival curves have been constructed, illustrating the time interval from the onset of symptoms to death. These curves demonstrate that for patients with heart failure, the median survival time is approximately two years; for those experiencing syncope, three years; and for individuals with angina, five years. (1) As demonstrated in the following study, (2) mortality rates among symptomatic patients suffering from moderate-to-severe AS and treated with medication were approximately 25% at one year and 50% at two years following the onset of symptoms. It is evident that in more than 50% of cases, the deaths were of a sudden nature. As delineated in **Supplementary Table 1**, the 2006 published practice guidelines of the joint ACC/AHA Task Force define the criteria for determining the severity of AS. (3,4)

| **Supplementary Table 1. ‡Standard Operating Procedures for Evaluating the Severity of Aortic Valve Stenosis** | | | |
| --- | --- | --- | --- |
| Key | Mild | Moderate | Severe |
| Mean Gradient (mmHg) | < 25 | 25 - 40 | > 40 |
| Jet velocity (m/s) | < 3.0 | 3.0 - 4.0 | > 4.0 |
| Valve area (cm2) | > 1.5 | 1.0 - 1.5 | < 1.0 |
| Valve area index (cm2/m2) | - - | - - | < 0.6 |

‡ This is an outline of how to assess the severity of AVS using echocardiography, as set out in the 2021 ACC/AHA guidelines.

Aortic valve replacement (AVR) has been determined to be the sole efficacious treatment for adults afflicted with severe symptomatic aortic stenosis, as reported by the American College of Cardiology (ACC). This procedure is regarded as a Class I indication. In addition to providing symptomatic relief, the operation has been demonstrated to result in enhanced long-term survival outcomes. (5) As demonstrated in a number of documented case series, the survival rates at one, three and five years post-surgery were found to vary considerably between patients who underwent surgery and those who did not. (6) As reported by Charlson and colleagues, (7) aortic valve replacement (AVR) surgery was performed on 49 of the 124 patients in the study cohort (39.5%). A logistic regression analysis was conducted with adjustments made for gender, comorbidity and baseline functional status. The results of this analysis indicated that patients aged less than 80 years were significantly more likely to undergo surgery when compared with older patients. Surgery was found to be associated with a significant reduction in mortality across all age demographics. In the one-year follow-up period, the survival rate of patients who underwent surgical intervention was found to be 87.8%, with this figure standing at 87.5% among the subset of patients aged 80 and above. In contrast, the survival rate among patients who did not undergo surgery was 54.7%, with this figure standing at 49.1% among the subset of patients aged 80 and above.

- **Alternative Therapies**

In circumstances where patients are categorised as being at excessive risk for surgery, or non-operable (non-surgical), alternatives may be considered. These alternatives may include the provision of temporary relief using a percutaneous technique known as balloon aortic valvuloplasty (BAV), or medical therapy (no obstruction-relieving intervention) for the inoperable patient. In patients diagnosed with congenital, non-calcified aortic stenosis (AS), both balloon aortic valve (BAV) implantation and surgical intervention have been demonstrated to be efficacious treatment modalities. Nevertheless, in cases of acquired degenerative AS, AVR surgery is the preferred treatment option.

The operative mortality rate for AVR surgery has been documented as ranging from 2 to 8% across a number of medical centres. An analysis of data from the STS National Database has revealed an average of 4% mortality rates. (6,8,9) Nevertheless, the operative risk is elevated to a greater extent for patients with concomitant conditions (4% to 29.6%) when compared with those without such concomitant conditions. Such concomitant conditions included, but were not limited to, emergency operations, (10) elderly patients, (10, 11) and patients with advanced New York Heart Association functional classification of heart failure. (10-12) The operative risk was also found to be higher for patients requiring concomitant coronary artery bypass surgery (11) and/or severely reduced preoperative left ventricular systolic function. (10-16) The latter is widely regarded as the most robust indicator of unfavourable surgical outcomes. A study revealed that patients with reduced LV function had a mortality rate that was twice as high as those with normal LV function (12.8% compared with 6.1%). (10) The concomitant presence of markedly impaired LV systolic function and a prior myocardial infarction leads to an elevated operative risk, with a mortality rate of 45% being observed in this group. (15)

The limited availability of therapeutic options for such high-risk profiles is a matter of concern. BAV has been the focus of research in the context of the treatment of calcific aortic stenosis in patients with severe coronary artery disease, reduced left ventricular function or significant medical comorbidities. When administered in this setting, BAV results in a temporary amelioration of valvular dysfunction and alleviation of symptoms arising from a minor augmentation of aortic valve area (typically <1.0 cm2). Nevertheless, in contradistinction to AVR surgery, BAV does not offer an effective and enduring treatment option for these patients. Notwithstanding the success of the BAV procedure, the underlying pathology remains extant. The valve leaflets continue to exhibit signs of thickening, calcification and deformation. Furthermore, in a significant proportion of cases, BAV merely results in the stretching of the valve leaflets, rather than any long-term morphologic change in valve orifice area. (29) Restenosis is a prevalent complication, especially among patients with unicuspid valves or those with valves affected by severe dysplasia (>60% at 6 months, virtually 100% at 2 years). The procedure is associated with a significant rate of complications and mortality. In a multicentre registry, (27) the procedural mortality was 3%, and the 30-day mortality was 14%. The incidence of major complications, including free myocardial wall perforation, myocardial infarction and severe aortic regurgitation, is also high (6-10%). (16-22)

A study (30) was conducted in order to report on predictors of long-term survival after percutaneous aortic valvuloplasty, using a series of 198 patients with a median follow-up period of seven months (range 0-18.8 months). Of these subjects, 81 underwent subsequent valvuloplasty or valve replacement, while 117 deceased. At one year post-intervention, the overall survival rate was recorded as 64%, while the event-free survival rate (i.e. the absence of death, repeat valvuloplasty or valve replacement) stood at 43%. The one-year cumulative survival rate for patients with a final valve area of ≤0.5 cm² was 44%, in comparison to 63% for patients with a valve area of >0.5 cm² (p = 0.2). In 2007, another report (31) described the experience of the research in 104 inoperable aortic stenosis patients, who underwent valvuloplasty and were followed for a mean of 3 ± 2 years. The one-year, two-year, and three-year mortality rates were 44%, 62%, and 71%, respectively. In the present study, 17 patients (21%) underwent repeat BAV procedures, and long-term mortality rates were found to be similar to those observed in patients who underwent a single BAV procedure. Consequently, there has been an increase in the motivation to develop minimally invasive AVR in recent years, with the objective of reducing the morbidities associated with traditional AVR. Recent progress in the domain of transcatheter therapeutics, encompassing stent devices and delivery catheters, has precipitated the innovation of TAVR.

**S2-Sub-study of the CT imaging**

Sites that possess the capacity to execute high-fidelity 3D scans will be selected to partake in a CT sub-study. All individuals enrolled in the CT subsample are required to meet the previously delineated inclusion criteria. Concomitant with the previously delineated exclusionary standards, subjects will be disqualified from participating in the sub-study if they exhibit or have exhibited a medical condition necessitating or intended to be followed by medication that modifies their coagulative state, specifically following the valve implantation procedure.

According to the findings of the survey conducted at the three clinical centers participating in this study, it is estimated that the total number of patients to be evaluated will amount to 1.020. This estimate is derived from the data bases of the aforementioned three clinical centers . Patients will be the subject of ongoing surveillance through the implementation of a multifaceted monitoring strategy. The strategy will include, but not be limited to, direct communication via mail to referring physicians of patients receiving procedures, on-site verification at the center where the patient underwent surgery, and telephone calls to healthcare facilities where patients were subsequently readmitted due to adverse events (AEs). The study centers will undertake periodic reviews of the inclusions against the predetermined criteria. A central feature of the screening protocol was the systematic documentation of patients who underwent various procedures, accompanied by echocardiographic and clinical follow-up assessments, ensuring comprehensive monitoring throughout the study. The database is a repository of information concerning the participation of women and minorities in clinical studies, a matter of significant concern for scientific, ethical, and social reasons, as well as for the generalisability of study results. SAVI-AVR is dedicated to the pursuit of scientific results while ensuring balanced recruitment of patients, irrespective of gender or ethnicity.

**S3- Clinical Centers**

This study will be conducted at each of the three clinical centres participating in the SuAVR-TAVR Protocol trial. Each clinical centre shall be responsible for promptly obtaining approval from the relevant institutional review board (IRB) for the protocol and informed consent, including any amendments. Furthermore, these centres shall be accountable for patient enrolment, accurate data collection and subsequent entry into an electronic data capture system (Microsoft Access datasheet; Redmond, Washington, USA). The coordinating centre will be the Centre Cardiologique du Nord in France. This centre will serve as the NCT on Clinical Trial Gov. Com. (ID: NCT05261204) and as the IRB (ID : 2022011057) as the primary trial centre.

- **Screening Phase**

The screening stage is conceptualised with two overarching aims: first, to obtain patient consent, and secondly, to ascertain their compatibility for participation in the study. The subsequent step involves submitting the presentation for case scrutiny for the Heart Teen scared decision making. Scheduling of screening procedures is to take place within 30 days prior to valve implant procedure, unless specified otherwise in the subsequent sections.

Patients who provide their consent will be entered into the electronic database (EDC) and assigned a unique subject identifier. The patient's status will be designated as 'Discontinued' in the event that the patient withdraws consent prior to or following the conclusion of the case discussion and upon initiation of all screening procedures (which include the case discussion call) and subsequent non-approval of the case discussion by the heart team.

The following information will be gathered during the screening process:

- **Operability**

The operability of the subject is to be assessed by determining the STS Risk Score, Logistic EuroSCORE and EuroSCORE II. The calculation of Logistic EuroSCORE will be conducted using the following reference: <http://www.euroscore.org/calcold.html>. Similarly, the calculation of EuroSCORE II will be conducted using the following reference: <http://www.euroscore.org/calc.html>.

- **Verification of Eligibility**
- **Informed Consent**

The study's investigator(s) and support staff will approach patients suffering from symptomatic, severe AVS to ascertain their interest in participating in the study. They will provide an overview of the study, including the background, risks, benefits and study procedures. If patients are interested in participating in the study, including the CT sub-study, if applicable, they will be required to sign the Institutional Review Board (IRB)-approved informed consent form prior to undergoing any study-specific procedures. Upon completion of the requisite formalities, patients who have consented to participate in the study will be entered into the study's electronic database (EDC). This will be meticulously compiled in a Microsoft Access datasheet (Redmond, Washington, USA).

- **Delineation of the investigator's profile, skills and expertise.**

All surgeons, cardiologists, coordinators and other investigators participating in the study are obliged to complete the Investigator Profile form. This form must include their hospital affiliation, address, telephone number, facsimile machine number, and email address. Moreover, surgeons, cardiologists, and coordinators are required to submit their Conflict of Interest Statements and Financial Disclosure Certifications via email. Finally, a qualified administrative health professional will be authorised to assist the aforementioned medical practitioners in carrying out the study.

The clinical investigators for this trial are cardiothoracic surgeons and interventional cardiologists who specialise in surgical repair of the mitral valve and transcatheter valve procedures, and who are experienced in the management of patients with ischemic and valvular heart disease. Specifically, to be eligible to participate in the study as a surgeon, candidates are required to have performed a minimum of 30 aortic valve procedures per year, averaged over a 2-year period. Interventional cardiologists, meanwhile, are required to have undergone specific training in the use of transcatheter therapies on new platforms for the treatment of structural heart valve disease.

- **Conflict of Interest and Financial Disclosure Statement**

This statement is designed to confirm that all investigators involved in this trial have no conflicts of interest with any institution that could potentially influence their participation. Each investigator is required to provide this statement and submit a financial disclosure agreement.

- **Patient privacy**

In accordance with the Health Insurance Portability and Accountability Act (HIPAA) guidelines, patient records will be maintained in a confidential manner (https://www.hhs.gov/hipaa/index.html). Subject documentation may be reviewed by study investigators, site Institutional Review Boards (IRBs), or single centre authorization by local ethics committee. However, it is imperative to note that all unique patient and hospital identifiers will be systematically removed. Aggregate data from this study may be disseminated in accordance with the publication policy documented in the trial agreements. It is, however, imperative to note that data containing patient identifiers will not be published. Subsequent to the inclusion of data, the statistician overseeing the analysis will meticulously examine both the original ACCESS datasheet and the extracted Excel datasheet (Redmond, Washington, USA). Thereafter, he or she will liaise with the principal investigators of each participating centre to ensure the preservation of confidentiality. A unified database will be employed for the final analysis.

**S4**-**Medical Histories and Physical Assessments**

Comprehensive medical histories and physical assessments, incorporating parameters such as height, weight, blood pressure, and heart rate. The system will also encompass all medications administered for cardiovascular indications, along with all antithrombotic and anticoagulant medications.

- **Assessment of Cardiopulmonary Status.**

The assessment of the cardiovascular and respiratory apparatuses is facilitated by the following methodologies:

- The Canadian Cardiovascular Society (CCS) status of angina should be documented, along with a 12-lead ECG. **(Supplementary table 3)**
- The New York Heart Association (NYHA) classification should also be included. **(Supplementary table 2)**
- A comprehensive TTE is conducted, encompassing an evaluation of aortic valve gradients (mean and peak), areas, indices, and the extent of regurgitation. This extensive assessment should also comprise a measurement of left ventricle systolic function (global and segmental).It is imperative that this initial echocardiogram is conducted within 90 days prior to the enrolment process.
- Cardiac imaging is an essential part of the pre-enrolment evaluation process. This imaging should include TEE, CT or MRI with 3D reconstruction to determine the area of the aortic valve annulus. This qualifying cardiac imaging must be performed within one year before enrolment, unless contraindicated.
- Aortic stenosis and coronary artery disease will be assessed using left and right heart catheterisation. Cardiac catheterisation must be undertaken within one year of enrolment, unless contraindicated.
- The SYNTAX score constitutes a mandatory element in the assessment of significant native coronary artery disease (CAD).
- A full lung check is vital for patients with a history of respiratory diseases.
- **Functional Assessment and Evaluation**
- The Six Minute Walk Test (6MWT) is a clinical evaluation used to assess functional mobility and frailty in patients. The test involves a five-metre walk, grip strength assessment, and a series of activities of daily living (ADL) to evaluate the patient's autonomy and independence. Additionally, laboratory parameters such as albumin levels are monitored to provide a comprehensive health picture.
- Quality of life assessments play a pivotal role in evaluating the impact of health conditions on patients' well-being. The Kansas City Cardiovascular Questionnaire (KCCQ) is a patient-reported outcome measure that focuses on symptoms, functionality, and quality of life.
- The EuroQol-5D-5L (EQ-5D-5L) is a well-established tool that quantifies health-related quality of life, providing a standardized metric for comparing health states across different populations. The Short Form 36 (SF-36) is a health survey that assesses physical and mental health, providing a comprehensive assessment of health status.
- **Clinical Laboratory Tests**

A complete compendium of clinical laboratory tests is provided below. These include white blood cells (WBC), haemoglobin (Hgb), and platelet count. Other tests comprise prothrombin time (PT) or international normalized ratio (INR) and Creatine kinase (CK)/CK-MB and/or troponin. The maximum time frame for these tests is 72 hours prior to the valve implant procedure.

- **Neurological Assessment and Evaluation**

The Mini Mental State Examination (MMSE), the National Institutes of Health Stroke Scale (NIHSS), and the Modified Rankin Scale (mRS) are three well-established tools used to assess cognitive function and the severity of neurological impairment in patients with stroke. **(Online Supplementary Table 6 and Table 9)**

- **Safety**
- Incidence of serious adverse events
- Reoperation for SVD/NSVD and freedom from re-operation in general.
- **Peri-operative Measures*.***
- Operative time for each procedure. For the standard surgical mitral valve operation, cardiopulmonary bypass (CPB) and cross clamp time are required.
- Blood loss and transfusion.

**S5 -Therapeutic Interventions**

Patients will be enrolled in either of the following two surgical procedures: The two surgical procedures to which patients will be enrolled are as follows:

1. A rapid deployment, sutureless aortic valve implant (Su-AVI), involving the use of a Perceval sutureless prosthesis (LivaNova plc, UK).
2. the Transcatheter Heart Valve (THV) procedure, which involves a transcatheter aortic valve replacement (TAVR).

- **Standard Aortic Valve Procedure**

Following the induction of anaesthesia, patients will undergo trans-oesophageal echocardiography (TEE) and pulmonary artery catheterisation in accordance with the centre's preference and cardiothoracic anaesthesia protocol. Central haemodynamics will be recorded, and TEE will be performed under loading conditions as close as possible to the patient's baseline. The intra-operative TEEs will be performed in a manner consistent with a standardised set of operating procedures, as outlined in the echo protocol appendix. The protocol will be made duly accessible to the respective sites and will be attached to the echo machine in the operating theatre. Maintaining adequate blood pressure and pulmonary artery pressure is essential to prevent the occurrence of anaesthetic effects, and this can be achieved using phenylephrine or 2,6-diisopropylphenol, as well as by ensuring adequate volume, during transesophageal echocardiogram (TEE) evaluations. Furthermore, observations have indicated that amongst those patients who have undergone AVR with the use of St-AV or Su-AV, confirmation of the absence of bicuspid aortic valve morphology and severe ascending aorta calcification (porcelain aorta lesion) has been demonstrated. The surgical procedures performed in this context are dictated by the institutional protocols in place, with the choice of approach being determined by either a full sternotomy or a partial sternotomy. The utilisation of cardiopulmonary bypass is a universal aspect of the surgical procedure. The use of single venous or double cannulation is a prevalent approach, and the employment of a vent system is utilised to extract air from the ventricle via a cannula. The selection of cardioplegia, either antegrade or retrograde, is a decision made by the surgeon at their discretion, as is the performance of coronary artery bypass grafting. Subsequently, the surgeon will assess the adequacy of the revascularization. In regard to the aortic valve, the approach may be either above, in which case the sutureless valve with its stent can be inserted more easily, or below, in cases where a xenograft is being transplanted. Inspection of the aortic valve is a prerequisite to verify the absence of any pre-existing organic pathology, such as endocarditis.

- **SuAVR**

The Perceval aortic valve (LivaNova, London, United Kingdom) represents a significant development in cardiovascular medicine. This self-anchoring, sutureless, and bio-prosthetic valve is composed of bovine pericardial leaflets encased within a self-expanding nitinol alloy cage. The inflow ring, constructed from a double layer of bovine pericardium, adheres to the native annulus, and a supraannular cuff serves to prevent paravalvular leak (PVL). Three eyelets affixed to the inflow ring facilitate the guidance of sutures, thereby ensuring the delivery of the valve to an intraannular position. The self-expanding configuration deploys radial force to secure the inflow ring, while the nitinol cage adapts to the sinuses of Valsalva. (32-36) **Supplementary Figure 1**

- **Technique**
- Aortotomy

To achieve the requisite height for cage insertion, and to facilitate closure of the aorta, it is necessary to carry out an additional aortotomy. A transverse aortotomy is advocated for this purpose, to be carried out 3.5 centimetres above the annulus, or alternatively 0.5 centimetres above the sinotubular junction (STJ), with the objective of approximating the epiaortic fat pad. In cases where native valve exposure has been undertaken, it is imperative that commissural traction sutures are removed prior to the deployment of Perceval valves. This precautionary step is necessary as the presence of these sutures has the potential to distort the annulus. In cases in which the aortotomy is at a lower level, care should be taken to avoid inadvertent entrapment of the outflow ring during suture closure. Such negligence has the potential to result in the displacement of the valve, which, when coupled with the process of heart-filling with blood during the subsequent cardiac phase, can lead to intimal tears.

- Sizing

In order to ensure an optimal outcome, particular attention is required in order to correctly size the object in question. It is imperative that the transparent sizer passes freely through the anulus, while the white sizer must encounter significant resistance to avoid failure. Incorrect sizing can lead to a variety of complications, including PVL secondary to inadequate annular sealing, central leaks due to failure of central leaflet coaptation, and late proximal misplacement. (36-36) An additional common error is oversizing the cage, which can impede its expansion and result in infolding of the cage, PVL, high gradients, or supraannular migration. (38) This can lead to a variety of complications, including PVL secondary to inadequate annular sealing, central leaks due to failure of central leaflet coaptation, and late proximal misplacement. The occurrence of complications due to oversizing is, consequently, more likely and in clear cases it is advisable to choose the smaller valve. However, when the native annulus is larger than the dimensions of the largest Perceval valve (XL), the use of a conventional stented bio-prosthesis is recommended.

- Deployment

The implementation of temporary guiding sutures within the annulus, at the nadir of each sinus, constitutes a fundamental step in the surgical procedure. Following this initial step, the guiding sutures are meticulously passed through the eyelets of the valve. The deployment phase is characterised by the paramount importance of the application of continuous traction in ensuring the successful deployment of the valve. The initial step of this procedure is the placement of temporary anchoring sutures within the annulus, situated at the nadir of each sinus. These sutures are then meticulously passed through the eyelets of the valve. (32-36) During the deployment phase, the application of continuous traction is paramount to ensure the precise positioning of the valve at the intended height. Due to its lower position, the non-coronary sinus is tilted towards the operator. This results in the valve holder being aligned with the left ventricular outflow tract (LVOT), perpendicular to the annulus. Post-deployment ballooning of the valve is a prerequisite for the inflow ring to conform to the annulus. The operator must then undertake a visual confirmation of the positioning, alignment, leaflet symmetry, coaptation, and patency of the coronary ostia. If the annulus is visible above or below the valve, this indicates that the height of deployment is incorrect. The commisures will be visible above the valve, but the annulus should not be visible. The use of forceps is then recommended to open the leaflets, thus confirming the absence of the annulus beneath the inflow ring. A circumferential inspection of the prosthesis-tissue interface is indicated for the purpose of detecting PVL. Although not officially endorsed, the explantation, recollapse and redeployment of the valve remains a viable option should the necessity arise. (32,39) The explantation procedure is initiated by the grasping of the commissural struts located on either side with forceps, and the subsequent application of upward traction. It is crucial to emphasise that excessive manipulation of the heart may result in the dislodgement of the valve following deployment. As such, in combined surgical procedures, the implantation should be performed as a final step and vigorous manoeuvres for the removal of air should be refrained from.

- **Potential risks associated with the procedures.**

SuAVR carries with it a certain degree of potential risk. The inherent risks of the overall procedures themselves include complications associated with SAVR and general anaesthesia. In addition to these risks, there are risks unique to the use of the study valve and its delivery systems.

It is imperative to adhere to the stipulated guidelines outlined in the Instructions for Use (IFU) and training manual when handling products and undertaking implant procedures. The objective here is to mitigate the risks associated with device utilisation. In addition, there is an undertaking to mitigate such risks by means of the meticulous selection of sites and investigators, together with their effective management. The selection of sites and investigators is initially determined by a set of predetermined criteria, with the objective of guaranteeing that the study personnel and their respective institutions possess the requisite qualifications to screen, perform and manage study procedures, in addition to providing support for the associated research requirements. The second element to be considered is the design of the trial management structure. The establishment of this structure is intended to ensure the implementation of a rigorous oversight framework for trial activities, encompassing the meticulous supervision of site and personnel performance. Additionally, this framework is designed to facilitate the dissemination of best practices among investigators and study personnel through various mechanisms, including investigator meetings, ongoing educational initiatives, and case reviews.

- ***Coronary Artery Bypass Grafting (CABG)***

Standard techniques will be employed to perform coronary artery bypass grafting with two-stage venous cannulation. The left internal thoracic artery (LITA) is recommended for left ascending anterior (LAD) grafts; however, the methods for selecting and harvesting conduits will not be prescribed. The specific technical details of bypass grafting will not be specified. The surgical investigator will perform complete revascularization based on their own judgment.

- **TAVR**

TAVR was pioneered by Cribier et al. more than 20 years ago. (40) Since then, evidence has accumulated regarding the efficacy and safety of this novel modality, which is now a major cornerstone in the treatment of structural heart disease (SHD). These minimally invasive procedures restore valve functionality in patients with severe calcific aortic valve stenosis (AVS) and have become a routine approach. (41-57) In symptomatic patients with severe AS who are aged between 65 and 80 years and who do not have anatomical contraindications to TAVR by transfemoral access, TAVR is recommended. TAVR is regarded as a satisfactory therapeutic alternative to SAVR. This conclusion is arrived at following shared decision-making, wherein the balance between expected patient longevity and valve durability is taken into consideration. (58-62) The extant evidence suggests that TAVR results in lower rates of mortality from any cause when compared to standard medical and surgical options. Moreover, mid and long-term follow-up demonstrates no evidence of restenosis or prosthesis dysfunction. (63-71) Moreover, recent randomised clinical trials (RCTs), meta-analyses and propensity score analyses, which corroborate registry reports, have revealed satisfactory outcomes of TAVR in terms of feasibility, long-term haemodynamics and functional improvement. However, it is crucial to acknowledge the findings from studies on the first and second generations of transcatheter heart valves (THV), which have documented a significant incidence of moderate to severe perivalvular aortic regurgitation. (72) This observation underscores the necessity to elucidate the underlying causes of this prevalent complication associated with TAVR, which has been linked to an elevated risk of mortality. (73) Subsequent follow-ups have revealed that the data has raised concerns about incomplete apposition of the prosthesis related to calcification or annular eccentricity, (74) undersizing of the device, and incorrect positioning of the valve. This has led to the identification of the most common determinants of paravalvular aortic regurgitation. (75)

- **Structural/Non Structural Valve Degeneration**

Bioprostheses are susceptible to structural valve degeneration (SVD), leading to diminished long-term functionality. SVD manifests predominantly as leaflet calcification, precipitating stenosis. However, it may also manifest as leaflet flail or tear, resulting in regurgitation. Risk factors for early SVD include patient age, renal failure, abnormal calcium metabolism and mismatch between the implanted valve and the patient. (76,77)

According to the American Society of Echocardiography's 2009 guidelines on the evaluation of bioprosthetic aortic valves, the term "possible stenosis" is defined as follows (78) : peak prosthetic aortic jet velocity of 3 to 4 m/s, mean gradient of 20 to 35 mmHg, and an effective orifice area of 0.8 to 1.2 cm². As outlined in the 2009 recommendations by the American Society of Echocardiography for the evaluation of bioprosthetic aortic valves, significant stenosis is defined as follows: peak prosthetic aortic jet velocity of >4 m/s; mean gradient of >35 mm Hg; and, finally, effective orifice area of <0.8 cm².

The VARC-3 (79) recommendations stipulate the following definitions for SVD and nonstructural valve degeneration NSVD related to aortic bioprosthetic valve dysfunction:

- -SVD is defined as permanent changes to the prosthetic valve, which may take the form of wear and tear, leaflet disruption, flail leaflet, leaflet fibrosis and/or calcification. Other possible causes of SVD include strut fracture and deformation.
- Nonstructural valve degeneration (NSVD) is defined as any abnormality intrinsic to the prosthetic valve that results in valve dysfunction. Examples include residual intra- or para-prosthetic aortic regurgitation; leaflet entrapment by pannus, tissue, or suture; inappropriate positioning or sizing; dilatation of the aortic root after stentless prostheses or aortic valve sparing operations; prosthesis-patient mismatch; and embolization.

The European Association for Cardiovascular Imaging proposes the incorporation of an increase in mean gradient at follow-up, in cases where obstruction is indicated by an increase in mean gradient of 10–19 mmHg during follow-up and significant obstruction with an increase ≥20 mm Hg. 9 More recently, a consensus statement from the European Association of Percutaneous Cardiovascular Interventions suggests a distinction between hemodynamic and morphological SVD. (13)

- **Structural Valve Degeneration**

SVD is defined by the deterioration of the leaflets or supporting structures of a bioprosthetic valve, resulting in thickening, calcification, tearing or disruption of the prosthetic valve materials. This ultimately leads to valve hemodynamic dysfunction, which is characterised by stenosis or regurgitation. Despite there being a paucity of research in this area, current hypotheses for the etiology of the condition include the following: the occurrence of tissue disruption or thickening over time due to mechanical stress in combination with abnormal flow shear stresses at the valve leaflet surface; the disruption of collagen fibres; and tissue calcification. The definition of SVD excludes other clinical valve disorders that are not due to valve tissue deterioration. These encompass patient-prosthesis mismatch, device malposition, paravalvular regurgitation and abnormal frame expansion, although these may be associated with early SVD. A particularly salient challenge pertains to the distinction between patient-prosthesis mismatch (PPM) and SVD. The principle caveat is that PPM should not be categorised as SVD, unless the leaflet morphology is deemed normal. This is notwithstanding the relatively diminutive valve area and elevated gradient. Furthermore, in instances where patient-prosthesis compatibility issues are encountered, dysfunctional valve haemodynamics become evident at the time of prosthesis implantation. In contrast to SVD and associated acquired stenosis, there is no deterioration in haemodynamics (i.e. increase in gradients and decrease in valve area) during follow-up. Furthermore, prosthetic valve thrombosis and infective endocarditis are not categorised as SVD. (79-81)

Nonetheless, it is vital to recognise that while complications may be effectively addressed, they nevertheless have the potential to result in SVD. This underscores the necessity for comprehensive management strategies. The staging of SVD is predicated on the status of the implanted valve rather than the patient's clinical condition. Consequently, while the presence or severity of symptoms and the necessity for reintervention are concomitant with the pathological condition of the implanted valve, they are not incorporated within our recommendations for the staging of SVD. (77-81)

Concerns have recently been raised regarding the occurrence of bioprosthetic valve thrombosis (BVT) and its potential association with subsequent structural heart disease (SHD). (82) Recent studies employing advanced imaging techniques, including 4-dimensional computed tomography (4DCT) with high-speed scanners, have documented leaflet immobility, thickness, and thrombosis both early and late following both SAVR and TAVI procedures. (83)

Furthermore, it should be noted that not all immobile bioprosthetic valve cusps are thrombosed; reduced cusp mobility can also result from valve deformation and unusual tensile forces on the prosthetic cusps. (84) The true incidence and clinical relevance of these different findings are as yet unknown, but it is important to consider them in future research. It is evident that the phenomenon is more prevalent than was previously recognized. (85) A recent study has indicated that the risk of leaflet thickening following TAVI is greater than that following SAVR, which may consequently lead to an earlier onset of risk of SVD after TAVI. (86)

As demonstrated **supplementary figure 2**, the classification of SVD is illustrated based on the findings of the echocardiographic assessment from Dvir and Bourgouignon

**S5- Endpoint Measurement**

- **Perioperative Measures**

The ensuing parameters are to be measured: operative time, cardiopulmonary bypass time, cross-clamp time, blood loss and transfusions.

- ***Cardiopulmonary bypass parameters***

The prospective collection of patient data will encompass the duration of myocardial ischaemia, cardiopulmonary bypass and retrograde or antegrade cardiac cardioplegia perfusion.

- ***Blood loss and transfusions***

The documentation of transfused red blood cell unit numbers is mandatory. A streamlined modification of the E-CABG perioperative bleeding classification will be adopted, (87) which has been demonstrated to be commensurate with the Universal Definition of Perioperative Bleeding (88) in terms of predicting early mortality. (89) Significant bleeding is outlined as the transfusion of a minimum of four units of red blood cells during and after the procedure and/or reoperation due to excessive intra-thoracic bleeding. (79) **(Online supplementary table 5)**

- ***Reoperation for bleeding***

The designation "reoperation for bleeding" is employed to denote any instance in which the sternum has been left open and subsequent surgery is required in order to address severe bleeding. It is of paramount importance to emphasise that instances of reopening the chest for haemodynamic instability without excessive bleeding, and pericardial or pleural puncture or chest tube placement for the retention of blood, do not fall under the classification of reoperations for bleeding. (79)

**Reference**

**Supplementary Reference**

1. Frank, S., A. Johnson, and J. Ross, Jr., Natural history of valvular aortic stenosis. Br Heart J, 1973. 35(1): p. 41-6.
2. Gardin, J.M., et al., Aortic stenosis: can severity be reliably estimated noninvasively? Chest, 1980. 77(2): p. 130-1.
3. Bonow, R.O., Carabello B, de Leon AC, Edmunds LH Jr, Fedderly BJ, Freed MD, Gaasch WH, et al., ACC/AHA Guidelines for the Management of Patients With Valvular Heart Disease. Executive Summary. A report of the American College of Cardiology/American Heart Association Task Force on Practice Guidelines (Committee on Management of Patients With Valvular Heart Disease). J Heart Valve Dis, 1998. 7(6): p. 672-707.
4. Bonow RO, Carabello BA, Chatterjee K, de Leon AC Jr, Faxon DP, Freed MD, Gaasch WH, Lytle BW, Nishimura RA, O'Gara PT, et al. [ACC/AHA 2006 guidelines for the management of patients with valvular heart disease: a report of the American College of Cardiology/American Heart Association Task Force on Practice Guidelines (writing Committee to Revise the 1998 guidelines for the management of patients with valvular heart disease) developed in collaboration with the Society of Cardiovascular Anesthesiologists endorsed by the Society for Cardiovascular Angiography and Interventions and the Society of Thoracic Surgeons.](https://pubmed.ncbi.nlm.nih.gov/16875962/) American College of Cardiology; American Heart Association Task Force on Practice Guidelines (Writing Committee to revise the 1998 guidelines for the management of patients with valvular heart disease); Society of Cardiovascular Anesthesiologists; J Am Coll Cardiol. 2006 Aug 1;48(3):e1-148
5. Birkmeyer, J.D., Stukel TA, Siewers AE, Goodney PP, Wennberg DE, Lucas FL. Surgeon volume and operative mortality in the United States. N Engl J Med, 2003. 349(22): p. 2117-27.
6. Schwarz, F., Baumann P, Manthey J, Hoffmann M, Schuler G, Mehmel HC, Schmitz W, Kübler W. The effect of aortic valve replacement on survival. Circulation, 1982. 66(5): p. 1105-10.
7. Charlson, E., A.T. Legedza, M.B. Hamel. Decision-making and outcomes in severe symptomatic aortic stenosis. J Heart Valve Dis, 2006. 15(3): p. 312-21.
8. Bessell, J.R., Gower G, Craddock DR, Stubberfield J, Maddern GJ. Thirty years experience with heart valve surgery: isolated mitral valve replacement. Aust N Z J Surg, 1996. 66(12): p. 806-12.
9. Vejlsted, H., Skagen K, Hansen PF, Halkier E. Immediate and long-term results in aortic valve replacement. Scand J Thorac Cardiovasc Surg, 1984. 18(1): p. 41-4.
10. Korfer, R., Schütt U, Minami K, Hartmann D, Körtke H, Lüth JU. Left ventricular function in heart valve surgery: a multidisciplinary challenge. J Heart Valve Dis, 1995. 4 Suppl 2: p. S194-7.
11. Mortasawi, A.,  Gehle S, Schröder T, Ennker IC, Rosendahl U, Dalladaku F, Bauer S, Albert A, Ennker J. [Aortic valve replacement in 80- and over 80-year-old patients. Short-term and long-term results]. Z Gerontol Geriatr, 2000. 33(6): p. 438-46.
12. Connolly, H.M. Oh JK, Schaff HV, Roger VL, Osborn SL, Hodge DO, Tajik AJ. Severe aortic stenosis with low transvalvular gradient and severe left ventricular dysfunction:result of aortic valve replacement in 52 patients. Circulation, 2000. 101(16): p. 1940-6.
13. Mullany, C.J. Aortic valve surgery in the elderly. Cardiol Rev, 2000. 8(6): p. 333-9.
14. Sundt, T.M.,  Bailey MS, Moon MR, Mendeloff EN, Huddleston CB, Pasque MK, Barner HB, Gay WA Jr. Quality of life after aortic valve replacement at the age of >80 years. Circulation, 2000. 102(19 Suppl 3): p. III70-4.
15. Powell, D.E., Tunick PA, Rosenzweig BP, Freedberg RS, Katz ES, Applebaum RM, Perez JL, Kronzon I. Aortic valve replacement in patients with aortic stenosis and severe left ventricular dysfunction. Arch Intern Med, 2000. 160(9): p. 1337-41.
16. Brogan, W.C., 3rd, Grayburn PA, Lange RA, Hillis LD. Prognosis after valve replacement in patients with severe aortic stenosis and a low transvalvular pressure gradient. J Am Coll Cardiol, 1993. 21(7): p. 1657-60.
17. Ambler, G., Omar RZ, Royston P, Kinsman R, Keogh BE, Taylor KM. Generic, simple risk stratification model for heart valve surgery. Circulation, 2005. 112(2): p. 224-31.
18. Bloomstein, L.Z.,  Gielchinsky I, Bernstein AD, Parsonnet V, Saunders C, Karanam R, Graves B. Aortic valve replacement in geriatric patients: determinants of in-hospital mortality. Ann Thorac Surg, 2001. 71(2): p. 597-600.
19. Chiappini, B.,  Camurri N, Loforte A, Di Marco L, Di Bartolomeo R, Marinelli G. Outcome after aortic valve replacement in octogenarians. Ann Thorac Surg, 2004. 78(1): p. 85-9.
20. Collart, F., Feier H, Kerbaul F, Mouly-Bandini A, Riberi A, Di Stephano E, Seree Y, Mesana TG, Metras D. Primary valvular surgery in octogenarians: perioperative outcome. J Heart Valve Dis, 2005. 14(2): p. 238-42; discussion 242.
21. Collart, F., Feier H, Kerbaul F, Mouly-Bandini A, Riberi A, Mesana TG, Metras D. Valvular surgery in octogenarians: operative risks factors, evaluation of Euroscore and long term results. Eur J Cardiothorac Surg, 2005. 27(2): p. 276-80.
22. Craver, J.M., Puskas JD, Weintraub WW, Shen Y, Guyton RA, Gott JP, Jones EL. 601 octogenarians undergoing cardiac surgery: outcome and comparison with younger age groups. Ann Thorac Surg, 1999. 67(4): p. 1104-10.
23. Edwards, F.H., Peterson ED, Coombs LP, DeLong ER, Jamieson WR, Shroyer ALW, Grover FL. Prediction of operative mortality after valve replacement surgery. J Am Coll Cardiol, 2001. 37(3): p. 885-92.
24. Rankin, J.S., Hammill BG, Ferguson TB Jr, Glower DD, O'Brien SM, DeLong ER, Peterson ED, Edwards FH. Determinants of operative mortality in valvular heart surgery. J Thorac Cardiovasc Surg, 2006. 131(3): p. 547-57.
25. Nowicki, E.R., Birkmeyer NJ, Weintraub RW, Leavitt BJ, Sanders JH, Dacey LJ, Clough RA, Quinn RD, et al., Multivariable prediction of in-hospital mortality associated with aortic and mitral valve surgery in Northern New England. Ann Thorac Surg, 2004. 77(6): p. 1966-77.
26. Jamieson, W.R., Edwards FH, Schwartz M, Bero JW, Clark RE, Grover FL. Risk stratification for cardiac valve replacement. National Cardiac Surgery Database. Database Committee of The Society of Thoracic Surgeons. Ann Thorac Surg, 1999. 67(4): p. 943-51.
27. Otto, C.M., Mickel MC, Kennedy JW, Alderman EL, Bashore TM, Block PC, Brinker JA, Diver D, Ferguson J, Holmes DR Jr, et al. Three-year outcome after balloon aortic valvuloplasty. Insights into prognosis of valvular aortic stenosis. Circulation, 1994. 89(2): p. 642-50.
28. Turina, J., Hess O, Sepulcri F, Krayenbuehl HP. Spontaneous course of aortic valve disease. Eur Heart J, 1987. 8(5): p. 471-83.
29. Kuntz, R.E., Tosteson AN, Berman AD, Goldman L, Gordon PC, Leonard BM, McKay RG, Diver DJ, Safian RD. Predictors of event-free survival after balloon aortic valvuloplasty. N Engl J Med, 1991. 325(1): p. 17-23.
30. O'Neill, W.W. Predictors of long-term survival after percutaneous aortic valvuloplasty: report of the Mansfield Scientific Balloon Aortic Valvuloplasty Registry. J Am Coll Cardiol, 1991. 17(1): p. 193-8.
31. Shareghi, S., Rasouli L, Shavelle DM, Burstein S, Matthews RV. Current results of balloon aortic valvuloplasty in high-risk patients. J Invasive Cardiol, 2007. 19(1): p. 1-5.
32. Spadaccio C, Nenna A, Pisani A, Laskawski G, Nappi F, Moon MR, Biancari F, Jassar AS, Greason KL, Shrestha ML, Bonaros N, Rose D. [Sutureless Valves, a "Wireless" Option for Patients With Aortic Valve Disease : JACC State-of-the-Art Review.](https://pubmed.ncbi.nlm.nih.gov/39019533/) J Am Coll Cardiol. 2024 Jul 23 ;84(4):382-407
33. Pfeiffer S, Fischlein T, Santarpino G. Sutureless Sorin Perceval aortic valve implantation. SeminThorac Cardiovasc Surg. 2017;29:1-7
34. Fischlein T, Meuris B, Hakim-Meibodi K, et al. The sutureless aortic valve at 1 year: a large multicenter cohort study.J Thorac Cardiovasc Surg 2016;151:1617–26.e4
35. LivaNova group. Perceval Implant Key Points. REF. FSCAHV-2016-001. Available at <https://www.hpra.ie/docs/defaultsource/field-safety-notices/august-2016/v29102_fsn.pdf>? sfvrsn=2. Accessed February 23, 2025.
36. Powell R, Pelletier MP, Chu MWA, et al. The Perceval sutureless aortic valve: review of outcomes, complications, and future direction. Innovations (Phila) 2017;12:155–73.
37. Amr G, Ghoneim A, Giraldeau G. First case of a sutureless Perceval valve delayed proximal migration. J Thorac Cardiovasc Surg 2017;153:e21–3.
38. Baert J, Astarci P, Noirhomme P, et al. The risk of oversizing with sutureless bioprosthesis in small aortic annulus. J Thorac Cardiovasc Surg 2017;153:270–2.
39. Santarpino G, Pfeiffer S, Concistre G, et al. A supra-annular malposition of the Perceval S sutureless aortic valve: the ‘χ-movement’ removal technique and subsequent reimplantation. Interact Cardiovasc Thorac Surg 2012;15:280–1.
40. Cribier A, Eltchaninoff H, Bash A, Borenstein N, Tron C, Bauer F, et al. Percutaneous transcatheter implantation of an aortic valve prosthesis for calcific aortic stenosis first human case description. Circulation. 2002 ;106 :3006-8.
41. Webb JG, Altwegg L, Boone RH, et al. Transcatheter aortic valve implantation : impact on clinical and valve-related outcomes. Circulation. 2009 Jun 16 ;119(23) :3009-16.
42. Leon MB, Smith CR, Mack M, Miller DC, et al. PARTNER Trial Investigators Transcatheter aortic-valve implantation for aortic stenosis in patients who cannot undergo surgery. N Engl J Med. 2010 Oct 21 ;363(17) :1597-607.
43. Smith CR, Leon MB, Mack MJ, et al ; PARTNER Trial Investigators Transcatheter versus surgical aortic-valve replacement in high-risk Patients.N Engl J Med. 2011 Jun 9 ;364(23):2187-98
44. Makkar RR, Fontana GP, Jilaihawi H, et al. Transcatheter aortic-valve replacement for inoperable severe aortic stenosis. N Engl J Med 2012 ;366 :1696-704.
45. Kodali SK, Williams MR, Smith CR, et al. Two-year outcomes after transcatheter or surgical aortic-valve replacement. N Engl J Med 2012 ;366 :1686-95.
46. Falk V. Transcatheter aortic valve replacement indications should not be expanded to lower-risk and younger patients. Circulation. 2014 Dec 23 ;130(25) :2332-42.
47. Adams DH, Popma JJ, Reardon MJ, et al. Transcatheter aortic-valve replacement with a selfexpanding prosthesis. N Engl J Med. 2014 ;370 :1790–8.
48. Mack MJ, Leon MB, Smith CR, et al. 5-year outcomes of transcatheter aortic valve replacement or surgical aortic valve replacement for high surgical risk patients with aortic stenosis (PARTNER 1) : a randomised controlled trial. Lancet. 2015 ;385 :2477–84.
49. Kapadia SR, Leon MB, Makkar RR, et al., PARTNER trial investigators. 5-Year outcomes of transcatheter aortic valve replacement compared with standard treatment for patients with inoperable aortic stenosis (PARTNER 1) : a randomised controlled trial. Lancet 2015 ;385 :2485–91.
50. Deeb GM, Reardon MJ, Chetcuti S, et al. 3-Year outcomes in high-risk patients who underwent surgical or transcatheter aortic valve replacement. J Am Coll Cardiol. 2016 ;67 :2565–74.
51. Siemieniuk RA, Agoritsas T, Manja V, et al. Transcatheter versus surgical aortic valve replacement in patients with severe aortic stenosis at low and intermediate risk : systematic review and meta-analysis. BMJ. 2016 ;354 : i5130
52. Leon MB, Smith CR, Mack MJ, et al. Transcatheter or surgical aortic-valve replacement in intermediate risk patients. N Engl J Med. 2016 ;374 :1609–20.
53. Thourani VH, Kodali S, Makkar RR, et al. Transcatheter aortic valve replacement versus surgical valve replacement in intermediate-risk patients : a propensity score analysis. Lancet. 2016 ;387 :2218–25.
54. Reardon MJ, Van Mieghem NM, Popma JJ, et al ; SURTAVI Investigators. Surgical or Transcatheter Aortic-Valve Replacement in Intermediate-Risk Patients.N Engl J Med. 2017 Apr 6 ;376(14) :1321-1331.
55. Mack MJ, Leon MB, Thourani VH, et al. Transcatheter aortic-valve replacement with a balloon-expandable valve in low-risk patients. N Engl J Med. 2019; 380:1695–705.
56. Popma JJ, Deeb GM, Yakubov SJ, et al. Transcatheter aortic-valve replacement with a selfexpanding valve in low-risk patients. N Engl J Med. 2019 ;380 :1706–15.
57. Makkar RR, Thourani VH, Mack MJ, et al ; PARTNER 2 Investigators. Five-Year Outcomes of Transcatheter or Surgical Aortic-Valve Replacement N Engl J Med. 2020 Jan 29 ;382(9) :799-809.
58. Spadaccio C, Fraldi M, Sablayrolles JL, Nappi F.J TAVI in Lower Risk Patients: Revolution or Nonsense? Keep Calm and Select Patients. J Am Coll Cardiol. 2016 Mar 22 ;67(11) :1380-1.
59. Nappi F, Spadaccio C, Sablayrolles JL. Pushing the Limits in Transcatheter Aortic Valve Replacement: High-Volume Center's Effect, Overconfidence, or Something Else ? JACC Cardiovasc Interv 2016 ;9 :2186-8.
60. Nappi F, Spadaccio C, Sablayrolles JL. Delayed prosthesis malposition after transcatheter aortic valve implantation causing coronaries obstruction. Eur J Cardiothorac Surg 2017 ;52 :1227-8.
61. Attias D, Nejjari M, Nappi F et al. How to treat severe symptomatic structural valve deterioration of aortic surgical bioprosthesis: transcatheter valve-in-valve implantation or redo valve surgery? 2018 Dec 1 ;54(6) :977-985.
62. Reardon MJ, Adams DH, Kleiman NS, et al. 2-year outcomes in patients undergoing surgical or selfexpanding transcatheter aortic valve replacement. J Am Coll Cardiol 2015 ;66 :113–21.
63. Siontis GCM, Overtchouk P, Cahill TJ, et al. Transcatheter aortic valve implantation vs. Surgical aortic valve replacement for treatment of symptomatic severe aortic stenosis: an updated meta-analysis. Eur Heart J. 2019 ;40 :3143–53.
64. Didier R, Eltchaninoff H, Donzeau-Gouge P, et al. Five-Year Clinical Outcome and Valve Durability After Transcatheter Aortic Valve Replacement in High-Risk Patients. Circulation. 2018 ;138 :2597-607
65. Panico RA, Giannini C, De Carlo M, et al. Long-term results and durability of the CoreValve transcatheter aortic bioprosthesis: outcomes beyond five years. EuroIntervention. 2019 ;14 :1639-47
66. Durand E, Sokoloff A, Urena-Alcazar M, et al. Assessment of Long-Term Structural Deterioration of Transcatheter Aortic Bioprosthetic Valves Using the New European Definition. Circ Cardiovasc Interv. 2019 ;12: e007597.
67. Mack M, Carroll JD, Thourani V, Vemulapalli S, Squiers J, Manandhar P, et Transcatheter Mitral Valve Therapy in the United States: A Report From the STS-ACC TVT Registry. J Am Coll Cardiol. 2021 Dec 7;78(23):2326-2353.
68. Thyregod HGH, Ihlemann N, Jørgensen TH, et al. Five-Year Clinical and Echocardiographic Outcomes from the Nordic Aortic Valve Intervention (NOTION) Randomized Clinical Trial in Lower Surgical Risk Patients. Circulation. 2019 Feb 1
69. Søndergaard L, Ihlemann N, Capodanno D, et al. Durability of Transcatheter and Surgical Bioprosthetic Aortic Valves in Patients at Lower Surgical Risk. J Am Coll Cardiol. 2019 Feb 12 ;73(5) :546-553.
70. Zhang XL, Zhang XW, Lan RF, Chen Z, Wang L, Xu W, Xu B. Long-term and Temporal Outcomes of Transcatheter Versus Surgical Aortic-valve Replacement in Severe Aortic Stenosis: A Meta-analysis. Ann Surg. 2021 Mar 1 ;273(3) :459-466
71. Zajarias A, Cribier AG. Outcomes and safety of percutaneous aortic valve replacement. J Am Coll Cardiol. 2009 May 19;53(20):1829-36
72. Generaux P, Head S.J, Hahn R., Daneault B, Kodali S., Williams M.R.,van Mieghem N, et al. Paravalvular leak after transcatheter aortic valve replacement : the new Achilles' heel ? 2013. J.Am. Coll.Cardiol.61(11),1125–1136.
73. Blanke P, Siepe M, Reinöhl J, Zehender M, Beyersdorf F, Schlensak C, Langer M, Pache G. Assessment of aortic annulus dimensions for Edwards SAPIEN Transapical Heart Valve implantation by computed tomography: calculating average diameter using a virtual ring method. Eur J Cardiothorac Surg. 2010 Dec ;38(6):750-8.
74. Détaint D, Lepage L, Himbert D, Brochet E, Messika-Zeitoun D, Iung B, Vahanian A.Determinants of significant paravalvular regurgitation after transcatheter aortic valve: implantation impact of device and annulus discongruence. JACC Cardiovasc Interv. 2009 Sep ;2(9) :821-7.
75. Kappetein AP, Head SJ, Généreux P, et al. Updated standardized endpoint definitions for transcatheter aortic valve implantation: the Valve Academic Research Consortium-2 consensus document. J Am Coll Cardiol. 2012 ;60 :1438–1454.
76. Attias D, Nejjari M, Nappi F et al. How to treat severe symptomatic structural valve deterioration of aortic surgical bioprosthesis: transcatheter valve-in-valve implantation or redo valve surgery? 2018 Dec 1 ;54(6) :977-985.
77. Côté N, Pibarot P, Clavel MA. Incidence, risk factors, clinical impact, and management of bioprosthesis structural valve degeneration. Curr Opin Cardiol. 2017;32:123–129.
78. Zoghbi WA, Chambers JB, Dumesnil JG, Foster E, Gottdiener JS, Grayburn PA, Khandheria BK, Levine RA, Marx GR, Miller FA Jr, Nakatani S, Quiñones MA, Rakowski H, Rodriguez LL, Swaminathan M, Waggoner AD, Weissman NJ, Zabalgoitia M; American Society of Echocardiography’s; Guidelines and Standards Committee; Task Force on Prosthetic Valves; American College of Cardiology Cardiovascular Imaging Committee; Cardiac Imaging Committee of the American Heart Association; European Association of Echocardiography; European Society of Cardiology; Japanese Society of Echocardiography; Canadian Society of Echocardiography; American College of Cardiology Foundation; American Heart Association; European Association of Echocardiography; European Society of Cardiology; Japanese Society of Echocardiography; Canadian Society of Echocardiography. Recommendations for evaluation of prosthetic valves with echocardiography and doppler ultrasound: a report From the American Society of Echocardiography’s Guidelines and Standards Committee and the Task Force on Prosthetic Valves, developed in conjunction with the American College of Cardiology Cardiovascular Imaging Committee, Cardiac Imaging Committee of the American Heart Association, the European Association of Echocardiography, a registered branch of the European Society of Cardiology, the Japanese Society of Echocardiography and the Canadian Society of Echocardiography, endorsed by the American College of Cardiology Foundation, American Heart Association, European Association of Echocardiography, a registered branch of the European Society of Cardiology, the Japanese Society of Echocardiography, and Canadian Society of Echocardiography. J Am Soc Echocardiogr. 2009;22:975–1014.
79. VARC-3 Writing Committee, Genereux P, Piazza N, Alu MC, Nazif T,Hahn RT, Pibarot P, et al. Valve Academic Research Consortium 3: updated endpoint definitions for aortic valve clinical research. J Am Coll Cardiol. 2021 Jun 1;77(21):2717-2746
80. Capodanno D, Petronio AS, Prendergast B, Eltchaninoff H, Vahanian A, Modine T, Lancellotti P, Sondergaard L, Ludman PF, Tamburino C, Piazza N, Hancock J, Mehilli J, Byrne RA, Baumbach A, Kappetein AP, Windecker S, Bax J, Haude M. Standardized definitions of structural deterioration and valve failure in assessing long-term durability of transcatheter and surgical aortic bioprosthetic valves: a consensus statement from the European Association of Percutaneous Cardiovascular Interventions (EAPCI) endorsed by the European Society of Cardiology (ESC) and the European Association for Cardio-Thoracic Surgery (EACTS). Eur J Cardiothorac Surg. 2017;52:408–417. D
81. Dvir D, Bourguignon T, Otto CM, Hahn RT, Rosenhek R, Webb JG, Treede H, Sarano ME, Feldman T, Wijeysundera HC, Topilsky Y, Aupart M, Reardon MJ, Mackensen GB, Szeto WY, et al; VIVID (Valve in Valve International Data) Investigators. [Standardized Definition of Structural Valve Degeneration for Surgical and Transcatheter Bioprosthetic Aortic Valves.](https://pubmed.ncbi.nlm.nih.gov/29358344/) Circulation. 2018 Jan 23;137(4):388-399.
82. Egbe AC, Pislaru SV, Pellikka PA, Poterucha JT, Schaff HV, Maleszewski JJ, Connolly HM. Bioprosthetic valve thrombosis versus structural failure: clinical and echocardiographic predictors. J Am Coll Cardiol. 2015;66:2285–2294. D
83. Makkar RR, Fontana G, Jilaihawi H, Chakravarty T, Kofoed KF, De Backer O, Asch FM, Ruiz CE, Olsen NT, Trento A, Friedman J, Berman D, Cheng W, Kashif M, Jelnin V, Kliger CA, Guo H, Pichard AD, Weissman NJ, Kapadia S, Manasse E, Bhatt DL, Leon MB, Søndergaard L. Possible subclinical leaflet thrombosis in bioprosthetic aortic valves. N Engl J Med. 2015;373:2015–2024
84. Waterbury TM, Raphael CE, Padang R, Eleid MF, Holmes DR Jr, Rihal CS, Pislaru SV. Not all immobile bioprosthetic valve cusps are thrombosed. JACC Cardiovasc Interv. 2017;10:e117–e118.
85. Egbe AC, Connolly HM, Schaff HV. Bioprosthetic valve thrombosis: what we know and what we need to know. J Thorac Cardiovasc Surg. 2016;152:975–978
86. Chakravarty T, Søndergaard L, Friedman J, De Backer O, Berman D, Kofoed KF, Jilaihawi H, Shiota T, Abramowitz Y, Jørgensen TH, Rami T, Israr S, Fontana G, de Knegt M, Fuchs A, Lyden P, Trento A, Bhatt DL, Leon MB, Makkar RR; RESOLVE; SAVORY Investigators. Subclinical leaflet thrombosis in surgical and transcatheter bioprosthetic aortic valves: an observational study. Lancet. 2017;389:2383–2392.
87. Biancari F, Ruggieri VG, Perrotti A, et al. European Multicenter Study on Coronary Artery Bypass Grafting (E- CABG registry): Study Protocol for a Prospective Clinical Registry and Proposal of Classification of Postoperative Complications. J Cardiothorac Surg 2015;10:90.
88. Dyke C, Aronson S, Dietrich W, et al. Universal definition of perioperative bleeding in adult cardiac surgery. J Thorac Cardiovasc Surg 2014;147:1458–63.
89. Bartoszko J, Wijeysundera DN, Karkouti K, et al. Comparison of Two Major Perioperative Bleeding Scores for Cardiac Surgery Trials: Universal Definition of Perioperative Bleeding in Cardiac Surgery and European Coronary Artery Bypass Grafting Bleeding Severity Grade. Anesthesiology 2018;129:1092–100.
90. Moussa ID, Klein LW, Shah B, et al. Consideration of a new definition of clinically relevant myocardial infarction after coronary revascularization: an expert consensus document from the Society for Cardiovascular Angiography and Interventions (SCAI). J Am Coll Cardiol. 2013 ;62 :1563–70.
91. Garcia-Garcia HM, McFadden EP, Farb A, et al., Academic Research Consortium. Standardized end point definitions for coronary intervention trials : the Academic Research Consortium-2 consensus document. Eur Heart J. 2018 ;39 :2192–207.
92. Thygesen K, Alpert JS, Jaffe AS, et al. ExecutiveGroup on behalf of the Joint European Society of Cardiology (ESC)/American College of Cardiology (ACC)/American Heart Association (AHA)/World Heart Federation (WHF) Task Force for the University Definition of Myocardial Infarction. Fourth Universal Definition of Myocardial Infarction (2018). J Am Coll Cardiol. 2018;72:2231–64.
