# Supplementary material for: Study protocol for an international prospective non-randomized trial evaluating the long term outcomes of Sutureless Aortic Valve Replacement Versus Transcatheter Valve Replacement for Aortic-Valve Stenosis in Patients at Risk to Severe Valve Obstruction: The SuAVR-TAVR trial
Source: Research Square preprint supplement (doi:10.21203/rs.3.rs-6618236/v1), 2025-06-18
Supplement: Supplementary file 5 [file 327bbebc054a6831e599b1ff.docx]

| **Table 1** Advice for patients who are suitable for SAVR or TAVR*† | |
| --- | --- |
| **ACC/AHA RECOMMENDATIONS** | |
| **COR 1 LOE A** | In the case of patients suffering from severe AS, both symptomatic and asymptomatic, who are below the age of 65, or for whom the life expectancy is above 20 years, and for whom there is an indication for aortic AVR, this is recommended. |
| **COR 1 LOE A** | For patients aged 65-80 with severe aortic stenosis who meet the criteria for TAVR, TAVR, SAVR or surgery is recommended. This decision is made after shared decision-making about longevity and durability. |
| **COR 1 LOE A** | For patients over 80 with severe aortic stenosis or those with less than 10 years to live and no anatomical contraindications, transfemoral TAVI is recommended over SAVR. |
| **COR 1 LOE A** | For patients with an indication for AVR for whom a bioprosthetic valve is preferred, but for whom transfemoral TAVI is not suitable, SAVR is recommended. |
| **COR 1 LOE A** | For patients of all ages with AVS where surgery is high risk, TAVR is recommended if the survival post-TAVR is >12 months and the quality of life is expected to be good. |
| **ESC RECOMMENDATIONS** | |
| **COR 1 LOE A** | TAVR is recommended for older patients (aged >75 years) or those considered to be high risk (STS-PROM/EuroSCORE IIf >8%) or for patients deemed unsuitable for surgery**.** |

*The recommendations under discussion are supported by Class of Recommendation (COR) I and Level of Evidence (LOE) A. The latter is the highest level of recommendation available, and implies both substantial safety and efficacy of the procedure.2,3 †As delineated in **Supplementary Table 1**, the 2020 published practice guidelines of the joint ACC/AHA Task Force define the criteria for determining the severity of AS

Abbreviations ; see text
