# Supplementary material for: Study protocol for an international prospective non-randomized trial evaluating the long term outcomes of Sutureless Aortic Valve Replacement Versus Transcatheter Valve Replacement for Aortic-Valve Stenosis in Patients at Risk to Severe Valve Obstruction: The SuAVR-TAVR trial
Source: Research Square preprint supplement (doi:10.21203/rs.3.rs-6618236/v1), 2025-06-18
Supplement: Supplementary file 6 [file 3280e83193c3977d2b585a4f.docx]

| **Table 2. Risks linked to SuAVR-TAVR** |
| --- |
| - **Risks linked to the procedure.** - death; - heart failure (low cardiac output); - myocardial infarction; - hemorrhage requiring transfusion or intervention ; - hematoma (changes at the access site); - pericardial effusion/cardiac tamponade; - cardiovascular or vascular injury, such as perforation or damage (dissection) of vessels, ventricle, myocardium or valvular structures that may require intervention ; - AV fistula; - arrhythmia; - conduction system injury, which may necessitate a permanent pacemaker ; - hypertension (high blood pressure) / hypotension (low blood pressure) ; - neurological changes including stroke/transient ischemic attack ; - embolization: air, calcification or thrombus ; - renal failure; - renal insufficiency; - respiratory failure (shortness of breath); - allergic dye reaction; - anesthesia reactions; - abnormal lab values and electrolyte imbalance; - fever; - infection including endocarditis, incisional site infection/inflammation and septicemia; - systemic peripheral ischemia/nerve injury - exercise intolerance (weakness). |
| - **Risks linked to the use of the study valve** - bleeding; - device explant ; - device embolization; - device migration or malposition requiring intervention ; - device thrombosis requiring intervention ; - emergency cardiac surgery; - endocarditis; - hemolysis; - anemia including hemolytic anemia; - non-emergent reoperation; - nonstructural dysfunction; - paravalvular leak; - structural valve deterioration; - valve stenosis; - valvular thrombosis; - potential coronary obstruction ; - injury at the site of venous, arterial or ventricular access that may require repair. |
