# Supplementary material for: Study protocol for an international prospective non-randomized trial evaluating the long term outcomes of Sutureless Aortic Valve Replacement Versus Transcatheter Valve Replacement for Aortic-Valve Stenosis in Patients at Risk to Severe Valve Obstruction: The SuAVR-TAVR trial
Source: Research Square preprint supplement (doi:10.21203/rs.3.rs-6618236/v1), 2025-06-18
Supplement: Supplementary file 9 [file 74c5ee418992df3de6e67517.docx]

| **Table 2. Standard Operating Procedures for Evaluating the Severity of Aortic Valve Stenosis** | | | |
| --- | --- | --- | --- |
| Key | Mild | Moderate | Severe |
| Mean Gradient (mmHg) | < 25 | 25 - 40 | > 40 |
| Jet velocity (m/s) | < 3.0 | 3.0 - 4.0 | > 4.0 |
| Valve area (cm2) | > 1.5 | 1.0 - 1.5 | < 1.0 |
| Valve area index (cm2/m2) | - - | - - | < 0.6 |
