# Supplementary material for: Study protocol for an international prospective non-randomized trial evaluating the long term outcomes of Sutureless Aortic Valve Replacement Versus Transcatheter Valve Replacement for Aortic-Valve Stenosis in Patients at Risk to Severe Valve Obstruction: The SuAVR-TAVR trial
Source: Research Square preprint supplement (doi:10.21203/rs.3.rs-6618236/v1), 2025-06-18
Supplement: Supplementary file 11 [file 943428d4db5040cff14af9b4.docx]

| **Supplementary Figure 9. Myocardial infarction (adapted from the definitions provided by the fourth Universal, SCAI and ARC-2)** |
| --- |
| - **Type 1. Definition : occurrence of spontaneous with a minimum delay of forty-eight hours following the primary procedure (index procedure**). † - ***Identification of an increase and/or decrease in cTn values with at least one value above the 99th percentile URL, accompanied by at least one of the following criteria***: - Symptoms of acute ischaemia - The presence of new ischaemic ECG changes, manifesting as either new ST-segment or T-wave changes, or new LBBB, is observed. - The presence of new pathologic Q-waves has been detected in >/= two contiguous leads. - The presence of imaging evidence indicative of a recent loss of viable myocardium, or the emergence of new wall motion abnormalities, is observed in a pattern that is consistent with an ischaemic aetiology. - The identification of a coronary thrombus can be achieved through the utilisation of angiography or autopsy. - A post-mortem visualization of an atherothrombus in the infarcted myocardium or a large necrotic area   accompanied by intramyocardial haemorrhage, irrespective of cTn values, fulfils the criteria for a type 1 MI. |
| - **Type 2. Definition : imbalance between the supply and demand of oxygen in the heart**. † - ***Detection of changes in cTn values, with at least one value above the 99th percentile URL, and evidence of a discrepancy between oxygen delivery and demand, not related to coronary thrombosis, requiring at least one of the following:*** - Symptoms indicative of ischaemia - Electrocardiogram (ECG) alterations indicative of recent ischaemia, encompassing novel ST-segment or T-wave modifications, or the emergence of new LBBB. - The presence of new pathologic Q-waves has been identified in >/= two contiguous leads. - The presence of imaging evidence indicative of new loss of viable myocardium or new wall motion abnormality is indicated. |
| - **Type 3 Definition : presence of MI in conjunction with sudden cardiac death.†** - ***Patients who experience cardiac death and present with symptoms indicating myocardial ischemia, in conjunction with alleged new ischemic ECG changes or ventricular fibrillation can cause death before blood samples can be taken, or before increases in cardiac biomarkers can be identified, or before an MI can be detected by autopsy.*** |
| - **Type 4 A. Definition : outlined in the established criteria for Percutaneous Coronary Intervention-related Myocardial Infarction, categorises instances in which </= 48 has elapsed following the initial procedure. *** - ***In patients with normal baseline CK-MB, the peak CK-MB measurement taken within 48 hours of the procedure is considered to be > /= 10 ULN. The local laboratory ULN or CK-MB is considered to be > /= 10 to 5 ULN if one or more of the following criteria are met :*** - The presence of new pathologic Q-waves has been detected in >/= two contiguous leads. - The presence of new persistent LBBB# is indicated. - The occurrence of flow-limiting angiographic complications in a major epicardial vessel or a branch with a diameter greater than 1.5 mm. - The presence of substantial new loss of viable myocardium on imaging related to the procedure. - ***In patients with elevated baseline CK-MB (or cTn): The CK-MB (or cTn) demonstrates an increase in value that is equivalent to the absolute increment recommended above. This increase represents the difference between the level measured at the most recent pre-procedure evaluation and new ECG modifications that have been described in the following section.*** - **Type 4B (Stent thrombosis)†** |
| - ***The presence of stent thrombosis should be documented by angiography or autopsy, employing the same criteria that are utilised for the diagnosis of type 1 MI.*** - Acute : The time frame under consideration is from 0 to 24 hours. - Subacute : The timeframe extends from 24 hours to 30 days. - Late : The timeframe extends from 30 days to 1 year. - Very late : The timeframe has elapsed one year after the implantation of the stent - **Type 4C : Definition. Coronary stent restenosis is a condition characterised by the recurrence of symptoms associated with blocked arteries, typically following PCI.** - The presence of focal or diffuse restenosis, or a complex lesion associated with a rise and/or fall of cTn values above the 99th percentile URL, is to be determined using the same criteria. This is employed in the context of type 1 MI. - **Type 5 periprocedural myocardial infarction (PM) (following SAVR, TAVR or CABG) is reported to occur at a time point of ≤ 48 hours after the index procedure. The following point requires further consideration. *** - ***In patients exhibiting normal baseline CK-MB, the maximum CK-MB value ascertained within 48 hours following the procedure is considered to be* >/= *10 ULN, as established by the local laboratory. Alternatively, the ULN or CK-MB is defined as* >/= *5 ULN when accompanied by one or more of the following:*** - The presence of new pathologic Q-waves has been detected in **>/=** two contiguous leads. - The presence of new persistent LBBB is indicated.# - The occurrence of angiographic complications that limit flow in a major epicardial vessel or a branch with a diameter greater than 1.5 mm. - Imaging results has been a considerable loss of viable myocardium following the procedure. - ***In the absence of CK-MB measurements and a normal baseline cTn, the measurement of cTn (I or T) within 48 hours of the procedure is elevated to >/= 70. The laboratory ULN is available for the sum of >/= 35 ULN, provided that one or more of the following criteria are met*** : - The presence of new pathologic Q-waves has been detected in two contiguous leads. - The presence of new persistent LBBB is indicated. # - The occurrence of angiographic complications that limit flow in a major epicardial vessel or a branch with a diameter greater than 1.5 mm. - Myocardial tissue deemed to be functional on pre-operative imaging has been determined to be non-viable in a substantial new loss, and is thus related to the aforementioned surgical procedure. - ***In patients with elevated baseline CK-MB (or cTn) : The CK-MB (or cTn) level increases by an absolute increment equal to the aforementioned recommended levels. The most recent pre-procedure ECG and new ECG findings are described herein.*** |

The utilisation of high-sensitivity (hs)-troponins is advocated for the diagnosis of spontaneous myocardial infarction (MI), yet its efficacy for the assessment of periprocedural MI remains to be elucidated through further research. Consequently, standard troponin assays are recommended for the evaluation of periprocedural MI. In instances where periprocedural biomarker elevation exceeds the upper limit of normal (ULN), yet does not meet the criteria for a myocardial infarction (MI), the appropriate categorisation should be 'myocardial injury not meeting MI criteria'.

**†** Thygesen et al (suppl Ref 92); * Moussa et al (suppl Ref 90) and Garcia-Garcia et al (suppl Ref 91); # The utilisation of LBBB criteria is recommended with prudence in the context of TAVR or SAVR, in view of the relatively elevated incidence of novel LBBB manifesting subsequent to these interventions.

Abbreviations; CABG; coronary bypass grafting; CK-MB, creatine kinase-MB; cTn, cardiac troponin; ECG, electrocardiogram; LBBB, left bundle branch block; MI, myocardial infarction; PCI; percutaneous coronary intervention; SAVR, surgical aortic valve replacement; TAVR, transcatheter aortic valve replacement; ULN, upper limit of normal; URL, upper reference limit.
