# Supplementary material for: Study protocol for an international prospective non-randomized trial evaluating the long term outcomes of Sutureless Aortic Valve Replacement Versus Transcatheter Valve Replacement for Aortic-Valve Stenosis in Patients at Risk to Severe Valve Obstruction: The SuAVR-TAVR trial
Source: Research Square preprint supplement (doi:10.21203/rs.3.rs-6618236/v1), 2025-06-18
Supplement: Supplementary file 12 [file a6b1760169675ef2f566b921.docx]

| **Table 7 Aortic bioprosthetic valve dysfunction** |
| --- |
| - **Categories of BVD** - **Structural valve deterioration (SVD)**   Intrinsic persistent alterations to the prosthetic valve, encompassing wear and tear, leaflet disruption, flail leaflet, leaflet fibrosis and/or calcification, strut fracture, or deformation   - **Non-structural valve dysfunction (NSVD)**   Any abnormality causing valve dysfunction. Examples include:  - residual aortic regurgitation;  - leaflet entrapment;  - inappropriate positioning or sizing;  - a dilated aortic root;  - mismatch between prosthesis and patient; and  - embolisation.   - **Thrombosis** - **Endocarditis**   The patient must fulfil at least one of the following criteria:  - Duke's criteria for endocarditis  - Evidence of abscess, pus or vegetation confirmed as secondary to infection by histological or microbiological studies during re-operation  - Evidence of abscess, pus or vegetation confirmed on autopsy |
| - **Clinical presentation** - **Subclinical:** - Any bioprosthetic valve dysfunction associated with absent or mild haemodynamic changes, and absent symptoms or sequelae - **Bioprosthetic valve failure (BVF)** - Stage 1: Any bioprosthetic valve dysfunction associated with clinically expressive criteria (new-onset or worsening symptoms, LV dilation/hypertrophy/dysfunction, or pulmonary hypertension) or irreversible Stage 3 haemodynamic valve deterioration (HVD) - Stage 2: Aortic valve reoperation or re-intervention - Stage 3: Valve-related death |

Abbreviations in the text
