# Supplementary material for: Study protocol for an international prospective non-randomized trial evaluating the long term outcomes of Sutureless Aortic Valve Replacement Versus Transcatheter Valve Replacement for Aortic-Valve Stenosis in Patients at Risk to Severe Valve Obstruction: The SuAVR-TAVR trial
Source: Research Square preprint supplement (doi:10.21203/rs.3.rs-6618236/v1), 2025-06-18
Supplement: Supplementary file 13 [file a8d0466f157e532f8c872c59.docx]

| **Table 9 Stroke size grading‡** |
| --- |
| - **Acute stroke severity#** - Mild neurological dysfunction: NIHSS 0-5 - Moderate neurological dysfunction: NIHSS 6-14 - Severe neurological dysfunction: NIHSS </=15 |
| - **Stroke disability†** - Fatal Stroke: death resulting from a stroke - Stroke with disability: mRS score of </=2 at 90 days and increase of >/=1 from pre-stroke baseline - Stroke without disability: mRS score of 0 (no symptoms) or 1 (able to carry out all usual duties and activities) at 90 days or no increase in mRS category from pre-stroke baseline |
| - **Neurological events timing** - Periprocedural: Occurring </=30 days after the index procedure   - Acute: Occurring </= 24 h after the index procedure   - Sub-acute: Occurring >24 h and #30 days after the index procedure - Early: Occurring >30 days and </=1 year after the index procedure - Late: Occurring >1 year after the index procedure |

‡Usually, every study should at least include information about stroke and disability from stroke.

**#**Assess severity using the NIHSS at stroke diagnosis.

**†**The mRS should be used to assess disability between 30 and 90 days, with 90 days being the best option.
