# Supplementary material for: Study protocol for an international prospective non-randomized trial evaluating the long term outcomes of Sutureless Aortic Valve Replacement Versus Transcatheter Valve Replacement for Aortic-Valve Stenosis in Patients at Risk to Severe Valve Obstruction: The SuAVR-TAVR trial
Source: Research Square preprint supplement (doi:10.21203/rs.3.rs-6618236/v1), 2025-06-18
Supplement: Supplementary file 14 [file ad0a023de797467aa0f22e31.docx]

| **Supplementary Table 6 Neurologic events** |
| --- |
| **Categories of neurologic events**  The subject displays symptoms of overt central nervous system injury (NeuroARC Type 1). |
| - **All stroke†** - **Ischaemic stroke***   The sudden onset of focal neurological signs or symptoms that are consistent with a focal or multifocal vascular territory within the brain, spinal cord, or retina (NeuroARC Type 1a or 1aH) and that meet one or more of the following criteria:   - - Signs or symptoms that persist for a duration of 24 hours or until death, accompanied by pathology or neuroimaging evidence of central nervous system (CNS) infarction, or the absence of other discernible causes.   - Signs or symptoms that endure for a duration of less than 24 hours, with pathology or neuroimaging confirmation of CNS infarction within the corresponding vascular territory**.** - **Haemorrhagic stroke.**   The sudden onset of neurological signs or symptoms due to intracranial bleeding from intracerebral or subarachnoid haemorrhage not attributable to trauma (NeuroARC Types 1b or 1c).   - **Stroke, not otherwise specified**   Is used to denote an acute onset of neurological signs or symptoms that persist for a duration of 24 hours or until death, in the absence of sufficient neuroimaging or pathology evidence to facilitate classification (NeuroARC Type 1d). |
| - **Symptomatic hypoxic-ischaemic injury**   The presence of non-focal (global) neurological signs or symptoms, accompanied by diffuse brain, spinal cord, or retinal cell death, as confirmed by pathology or neuroimaging, and attributable to hypotension or hypoxia (NeuroARC Type 1e) is observed. |
| - **Covert CNS injury (NeuroARC Type 2)** - **Covert CNS infarction**# **or haemorrhage**   The presence of neuroimaging or pathological evidence of central nervous system (CNS) focal or multifocal ischaemia (NeuroARC Type 2a or 2aH) or haemorrhage (NeuroARC 2b) is indicated in the absence of acute neurological symptoms that are consistent with the location of the lesion or bleeding. |
| - **Neurologic dysfunction (acutely symptomatic) without CNS injury (NeuroARC Type 3)** - **TIA**   The presence of transient focal neurological signs or symptoms lasting for a maximum of 24 hours is indicative of focal brain, spinal cord, or retinal ischaemia. However, the absence of evidence of acute infarction by neuroimaging or pathology, or the absence of imaging performed (NeuroARC Type 3a or Type 3aH), is also a consideration.   - **Delirium without CNS injury**   The presence of transient non-focal neurological signs or symptoms of variable duration has been noted, typically without any evidence of infarction as determined by neuroimaging or pathology, or in cases where neuroimaging has not been performed (NeuroARC Type 3b). |
| - **Stroke grading** see table 9 |

**†**It is generally accepted that all studies must report on the occurrence of stroke and the resultant stroke disability. *The phenomenon under discussion includes instances of haemorrhagic conversion in cases where ischaemic infarction is the primary underlying mechanism. #In instances where the location of central nervous system (CNS) infarction does not correspond with transient (<24 h) symptoms, the event should be classified as covert CNS infarction (NeuroARC Type 2a) and transient ischaemic attack (TIA) (NeuroARC Type 3a), rather than as an ischaemic stroke.
