# Supplementary material for: Study protocol for an international prospective non-randomized trial evaluating the long term outcomes of Sutureless Aortic Valve Replacement Versus Transcatheter Valve Replacement for Aortic-Valve Stenosis in Patients at Risk to Severe Valve Obstruction: The SuAVR-TAVR trial
Source: Research Square preprint supplement (doi:10.21203/rs.3.rs-6618236/v1), 2025-06-18
Supplement: Supplementary file 15 [file b146b71865d3159cc40f64fd.docx]

| **Supplementary Table 5** **Bleeding and transfusions†** |
| --- |
| Overt bleeding‡ that meets one of the following criteria:   - **Type 1:** - Bleeding that is not serious but does require medical attention by a healthcare professional, which may result in hospitalisation, an increased level of care, or medical evaluation (BARC 2). - Bleeding that requires a transfusion of 1 unit of whole blood/red blood cells (BARC 3a). - **Type 2:** - Signs of bleeding which needs 2-4 units of whole blood/red blood cells (BARC 3a) - Signs of bleeding with a drop in haemoglobin of 3 g/dL (>= 1.86 mmol/L) to 5 g/dL (< 3.1 mmol/L) (= BARC 3a) - **Type 3:** - Signs of bleeding in a vital organ, like the brain, spine, eye, heart, or around the heart (if blood flow is severely reduced and urgent action is needed), or in the muscle with swelling (BARC 3b). BARC 3c) - Overt bleeding causing low blood pressure (systolic blood pressure <90 mmHg for >30 minutes and not improving with fluids) or needing medicines to raise blood pressure or surgery (BARC 3b) - Overt bleeding requiring more surgery or treatment to stop bleeding (BARC 3b, BARC 4). - Chest tube output of >/= 2 litres within 24 hours after surgery (BARC 4) - Signs of bleeding that needs a transfusion of 5 units of whole blood/red blood cells (BARC 3a)* - Signs of bleeding that is causing a drop in haemoglobin level of >/= 5 g/dL (>/= 3.1 mmol/L) (BARC 3b). - **Type 4:** - Bleeding that is not controlled can lead to death. It should be classified as: - Probable: Clinical suspicion (BARC 5a) - Definite: This has been confirmed by an autopsy or imaging scan (BARC 5b). |

**†**The timing of blood transfusions, the type of blood product used and the total number given should be recorded and reported during the procedure itself, during the patient's entire stay in hospital, and after they are discharged from hospital, even if there is no sign of active bleeding. ‡ Overt bleeding is any bleeding that you can see or find by doing tests (like imaging). Any bleeding that happens while a procedure is being done should be considered as overt bleeding. * The total number of transfusions should be recorded in three separate categories: (i) within 48 hours of the initial procedure, (ii) during the total length of the initial procedure hospital stay, and (iii) during any later hospital visits.
