# Supplementary material for: Study protocol for an international prospective non-randomized trial evaluating the long term outcomes of Sutureless Aortic Valve Replacement Versus Transcatheter Valve Replacement for Aortic-Valve Stenosis in Patients at Risk to Severe Valve Obstruction: The SuAVR-TAVR trial
Source: Research Square preprint supplement (doi:10.21203/rs.3.rs-6618236/v1), 2025-06-18
Supplement: Supplementary file 16 [file b79e758a750e066ff941af22.docx]

| **Table 6. Stages of bioprosthetic valve deterioration†** |
| --- |
| - **Stage 1: Morphological valve deterioration** - The finding of structural valve deterioration, non-structural valvular dysfunction (other than paravalvular regurgitation or prosthesis-patient mismatch), thrombosis or endocarditis, serves as an indication of the specified condition, provided significant haemodynamic alterations are not observed. |
| - **Stage 2: Moderate haemodynamic valve deterioration** - A 10 mmHg rise in the mean transvalvular gradient resulted in a mean gradient of 20 mmHg, accompanied by a decrease in EOA of 0.3 cm² (25%) and/or a decrease in DVI of 0.1 (20%), as compared with an echocardiographic assessment performed 1–3 months post-procedure. Alternatively, a new occurrence or increase of a grade 1 of intra-prosthetic AR resulted in moderate AR. |
| - **Stage 3: Severe haemodynamic valve deterioration** - A rise in the mean transvalvular gradient of 20 mmHg resulted in a mean gradient of 30 mmHg, accompanied by a decrease in EOA of 0.6 cm² (50%) and/or a decrease in Doppler velocity index of 0.2 (40%), as compared with an echocardiographic assessment performed 1–3 months post-procedure, or a new occurrence or increase of 2 grades of intraprosthetic AR, resulting in severe AR. |

**†**This approach has been adapted from VARC 3 writing committee, (79), Capodanno et al. (Ref 80 suppl) and Dvir et al. (Ref 81 suppl).

**†**In order to assess the presence and severity of haemodynamic valve deterioration, it is first necessary to differentiate between true-haemodynamic changes and inter-echo variability in the measurement of gradient, EOA, DVI, or AR. In particular, it is recommended that a consistent window be employed for continuous-wave Doppler interrogation when comparing gradients in early (1-3 months) post-AR echo versus follow-up echo. In order to confirm the presence of haemodynamic valve deterioration and to determine its stage and aetiology, each case must be subject to individual adjudication. It is crucial to emphasise that haemodynamic valve deterioration can be triggered both by structural valve deterioration and non-structural dysfunction. Non-structural dysfunction may include such factors as valve thrombosis and endocarditis. In order to establish a differential diagnosis between the various aetiologies of haemodynamic valve deterioration, it is essential to undertake a comprehensive evaluation of valve leaflet morphology and structure. The haemodynamic dysfunction criterion is dependent upon normal flow. The assessment of the 3-class grading scheme is fundamental to the evaluation of haemodynamic dysfunction.

Abbreviations; AR, aortic regurgitation; DVI, Doppler velocity index; EOA, effective orifice area
