# Supplementary material for: Study protocol for an international prospective non-randomized trial evaluating the long term outcomes of Sutureless Aortic Valve Replacement Versus Transcatheter Valve Replacement for Aortic-Valve Stenosis in Patients at Risk to Severe Valve Obstruction: The SuAVR-TAVR trial
Source: Research Square preprint supplement (doi:10.21203/rs.3.rs-6618236/v1), 2025-06-18
Supplement: Supplementary file 17 [file cc967a705afd7ae1a47152e1.docx]

| **Table 5. Post Procedure Follow Up Visit** |
| --- |
| - **Systems** - Physical assessment including weight, blood pressure, and heart rate - All drugs used for cardiovascular effects and all antithrombotic/anticoagulant drugs - Evaluation of adverse events |
| - **Cardiopulmonary:** - 12-lead ECG - NYHA classification - Comprehensive transthoracic echocardiogram (TTE) - CT Scan (only for those patients in the CT sub-study) |
| - **Clinical lab testing:** - WBC, Hgb, and platelet count - PT or INR - Creatinine - BNP |
| - **Neurological Evaluations:** - MMSE - NIHSS - Modified Rankin Scale |
| - **Functional Evaluations:** - 6MWT - Quality of Life Questionnaires - KCCQ - EQ-5D-5L - SF-36 |

Abbreviations is shown in the text
