# Supplementary material for: Study protocol for an international prospective non-randomized trial evaluating the long term outcomes of Sutureless Aortic Valve Replacement Versus Transcatheter Valve Replacement for Aortic-Valve Stenosis in Patients at Risk to Severe Valve Obstruction: The SuAVR-TAVR trial
Source: Research Square preprint supplement (doi:10.21203/rs.3.rs-6618236/v1), 2025-06-18
Supplement: Supplementary file 19 [file e1fb9724c2b4c8d088b42b91.docx]

| **Supplementary Table 2 Canadian Cardiovascular Society Classification (CCSC)† [30]** | | |
| --- | --- | --- |
| **Clinical Findings** | **Characteristics** | **Grade** |
| No limitation of ordinary activity | Normal physical activity (such as walking or climbing stairs) does not trigger angina. Angina can occur with intense, rapid or prolonged exercise at work or during leisure activities. | I |
| Slight limitation of ordinary activity | Angina may occur with • walking or climbing stairs rapidly.  • walking uphill.  • walking or stair climbing after meals or in the cold in the wind or under emotional stress, or only during the few hours after awakening.  • walking more than 2 blocks on the level at a normal pace and in normal conditions .  • climbing more than 1 flight of ordinary stairs at a normal pace and in normal conditions. | II |
| Marked limitation of ordinary physical activity | Angina may occur after   - walking 1-2 blocks on level ground.   or   - climbing 1 flight of stairs at a normal pace. | III |
| Unable to carry on any physical activity without discomfort | Angina may occur when the patient is resting | IV |

†The Canadian Cardiovascular Society (CCSC) Classification of Angina Pectoris is a system that categorises patients exhibiting angina symptoms according to the severity of their symptoms. The classification employs the degree of restriction of day-to-day functions and the nature of physical activity that precipitate an angina episode as its criteria.
