# Supplementary material for: Study protocol for an international prospective non-randomized trial evaluating the long term outcomes of Sutureless Aortic Valve Replacement Versus Transcatheter Valve Replacement for Aortic-Valve Stenosis in Patients at Risk to Severe Valve Obstruction: The SuAVR-TAVR trial
Source: Research Square preprint supplement (doi:10.21203/rs.3.rs-6618236/v1), 2025-06-18
Supplement: Supplementary file 20 [file e75b3acf45ea70e00652d07d.docx]

| **Table 8 Mortality†** |
| --- |
| **Causes of mortality**   - **All-cause mortality** - **Cardiovascular mortality**   The following criteria must be met for a death to be considered:   - The following conditions are associated with heart failure: cardiogenic shock, bioprosthetic valve dysfunction, myocardial infarction, stroke, thromboembolism, bleeding, tamponade, vascular complications, arrhythmia or conduction system disturbances, cardiovascular infection (e.g. mediastinitis, endocarditis), or other clear cardiovascular cause. - The following conditions are associated with intraprocedural death: sudden death, and death of unknown cause. - **Valve-related mortality*** - It is hypothesised that the death was related to bioprosthetic valve dysfunction. - **Non-cardiovascular mortality** - Death was caused by a non-cardiovascular condition, such as :   - Respiratory failure not related to heart failure (e.g. pneumonia)  - Renal failure  - Liver failure  - Infection (e.g. urosepsis)  - Cancer  - Trauma  - Suicide |
| **Timing of mortality**   - **Periprocedural mortality**   The following criteria must be met for a death to be considered:   - The occurrence of the event is the 30 day following the index procedure. - The occurrence of the event is more than 30 days following the index procedure but during the index admission**.** - **Early mortality** - The event of death must have occurred within 30 days, but within one year, following the initial admission to hospital. - **Late mortality** - The demise of the subject occurred more than one year subsequent to the initial hospitalization. |

†The reporting of mortality should be conducted in accordance with the Kaplan–Meier method.

* The term is defined in **Table 7.**
