# Supplementary material for: Study protocol for an international prospective non-randomized trial evaluating the long term outcomes of Sutureless Aortic Valve Replacement Versus Transcatheter Valve Replacement for Aortic-Valve Stenosis in Patients at Risk to Severe Valve Obstruction: The SuAVR-TAVR trial
Source: Research Square preprint supplement (doi:10.21203/rs.3.rs-6618236/v1), 2025-06-18
Supplement: Supplementary file 21 [file f25dfecae4ab667a4bc85bd2.docx]

| **Table 4 Recommended anticoagulation/antithrombotic regimen** | | |
| --- | --- | --- |
|  | **SuAVR** | **TAVR** |
| **Drive access** | Sternotomy or mini-sternotomy | Femoral vascular access |
| **Anesthesia** | General | General/Conscious sedation |
| **The following protocol is to be observed prior to the implantation of the valve** | | |
|  | The recommended daily dosage of acetylsalicylic acid is between 81 and 100 milligrams. | The recommended daily dosage of acetylsalicylic acid is between 81 and 100 milligrams. |
|  | - BMS patients within one month or those with a DES within 12 months should continue their Clopidogrel/prasugrel therapy before their implant. - Patients with AF prescribed warfarin should undergo bridging with LMWH or UFH before an implant. - TEE is not mandatory for patients with atrial fibrillation before an implant. If TEE during AVR reveals a clot, the procedure will be aborted and delayed until the patient has been on warfarin or dabigatran for at least 30 days. For surgical patients with LA clot as revealed by TEE, the implant procedure may proceed as standard. | - BMS patients within one month or those with a DES within 12 months should continue their Clopidogrel/prasugrel therapy before their implant. - If patients have atrial fibrillation and are prescribed warfarin, they should undergo bridging with LMWH or UFH before an implant. - TEE isn't necessary to rule out a left atrial thrombus before TAVR in patients with persistent or paroxysmal atrial fibrillation and no anticoagulation. However, if the TEE procedure during TAVR reveals a clot, the TAVR will be aborted and delayed until 30 days on warfarin or dabigatran. TAVR can only proceed once the clot is eliminated. - In addition to ASA, the following measures are recommended for patients undergoing TAVR/PCI. - In transfemoral TAVR, the loading dose of clopidogrel is 300 or 600 mg, given before the implant. |
| **The following protocol is to be observed intraprocedural.** | | |
|  | Heparin will be given to achieve or maintain an ACT greater than 250 seconds. | Heparin will be given to achieve or maintain an ACT greater than 250 seconds |
|  |  |  |
|  | **SuAVR** | **TAVR** |
| **The following protocol is to be observed post valve implant procedure** | | |
| **Category I**  **for Stroke**  **Risk**  No atrial  fibrillation,  No recent  stents | - ASA 81mg qd - Clopidogrel 75 mg was initiated within 24 hours of surgery for one month, contingent on its clinical safety and the surgical team's discretion. Clopidogrel is contraindicated in centres using warfarin post-surgical AVR anti-coagulation . | - ASA 81mg qd - A 300 mg loading dose of Clopidogrel is recommended six hours before or after implantation. - Take 75 mg of clopidogrel once a day for at least one month after the procedure. |
| **Category II**  **for Stroke**  **Risk**  No atrial  fibrillation,  recent  stents | - ASA 81mg qd - Discontinue clopidogrel before surgery in cases of BMS within one month or DES within 12 months. - Clopidogrel 75 mg was given 24 hours after surgery if appropriate, for at least one month after SAVR in patients with BMS and 12 months in those with DES. | - ASA 81mg qd - Take Clopidogrel 75 mg once daily for one month before and after the implant procedure, without interruption. |
| **Category III**  **for Stroke**  **Risk**  Atrial  fibrillation,  No recent  stents | - ASA 81mg qd - If appropriate, patients should be initiated on warfarin or dabigatran 24 hours after PCI, continuing for a minimum of one month or until their condition stabilises. If the patient's condition permits, warfarin therapy should be preceded by a bridging phase of unfractionated or LMWH until the INR reaches a therapeutic level. - If patients are deemed unsuitable for warfarin or dabigatran, an alternative is Clopidogrel 75 mg once-daily (in addition to ASA 81 mg). | - ASA 81mg qd - After TAVR, start warfarin or dabigatran if safe. Keep taking this anticoagulation therapy for at least one month, or longer if possible. If warfarin is safe, use bridging with unfractionated or low-molecular-weight heparin until the INR reaches the right level. - If patients are unsuitable for warfarin or dabigatran, clopidogrel (75 mg once daily) is an alternative. |

Abbreviations; AF, atrial fibrillation; ASA, aspirin; BMS, bar metal stent; DES, drug-eluting stent; INR, International Normalised Ratio; LA, left atrium; LMWH, low-molecular weight heparin; UFN, unfractionated heparin; others abbreviations in the text
