# Supplementary material for: Study protocol for an international prospective non-randomized trial evaluating the long term outcomes of Sutureless Aortic Valve Replacement Versus Transcatheter Valve Replacement for Aortic-Valve Stenosis in Patients at Risk to Severe Valve Obstruction: The SuAVR-TAVR trial
Source: Research Square preprint supplement (doi:10.21203/rs.3.rs-6618236/v1), 2025-06-18
Supplement: Supplementary file 22 [file f9ebb68c26b81d40b2f6c525.docx]

| **Supplementary Table 10 Criteria for defining postoperative acute kidney injury†** |
| --- |
| **Stage 1**  AKI that fulfils at least one of the following criteria:   - Increase in serum creatinine >/=150–200% (>/= 1.5–2.0 increase) within 7 days compared with baseline - Increase of >/= 0.3mg/dL (>/=26.4 mmol/L) within 48 h of the index procedure |
| **Stage 2**  AKI that fulfils the following criterion:   - Increase in serum creatinine >200–300% (>2.0–3.0 increase) within 7 days compared with baseline |
| **Stage 3**  AKI that fulfils at least one of the following criteria:  Increase in serum creatinine >300% (>3.0 increase) within 7 days compared with baseline  Serum creatinine $4.0 mg/dL (>/= 354 mmol/L) with an acute increase of >/= 0.5 mg/dL (>/= 44 mmol/L) |
| **Stage 4**  AKI requiring new temporary or permanent renal replacement therapy |

† Adapted from Clinical Practice Guidelines for Acute Kidney Injury 2012. Serum creatinine level changes during hospitalization. Urine output criteria are impractical in daily practice, so AKI should be defined based on serum creatinine values.The following criteria might be used to define acute kidney injury in a dedicated AKI study: AKI Stage 1: Urine output <0.5 mL/kg/h for 6 hours but <12 hours ; AKI Stage 2: Urine output <0.5 mL/kg/h for 12 hours ;AKI Stage 3: Urine output <0.3 mL/kg/h for 24 hours or anuria for 12 hours. Abbreviation; AKI ; acute kidney injury. Ref (26,29,30)
